# Supplementary material
Source: publisher site journal article supplement (https://www.dovepress.com/article/497087)

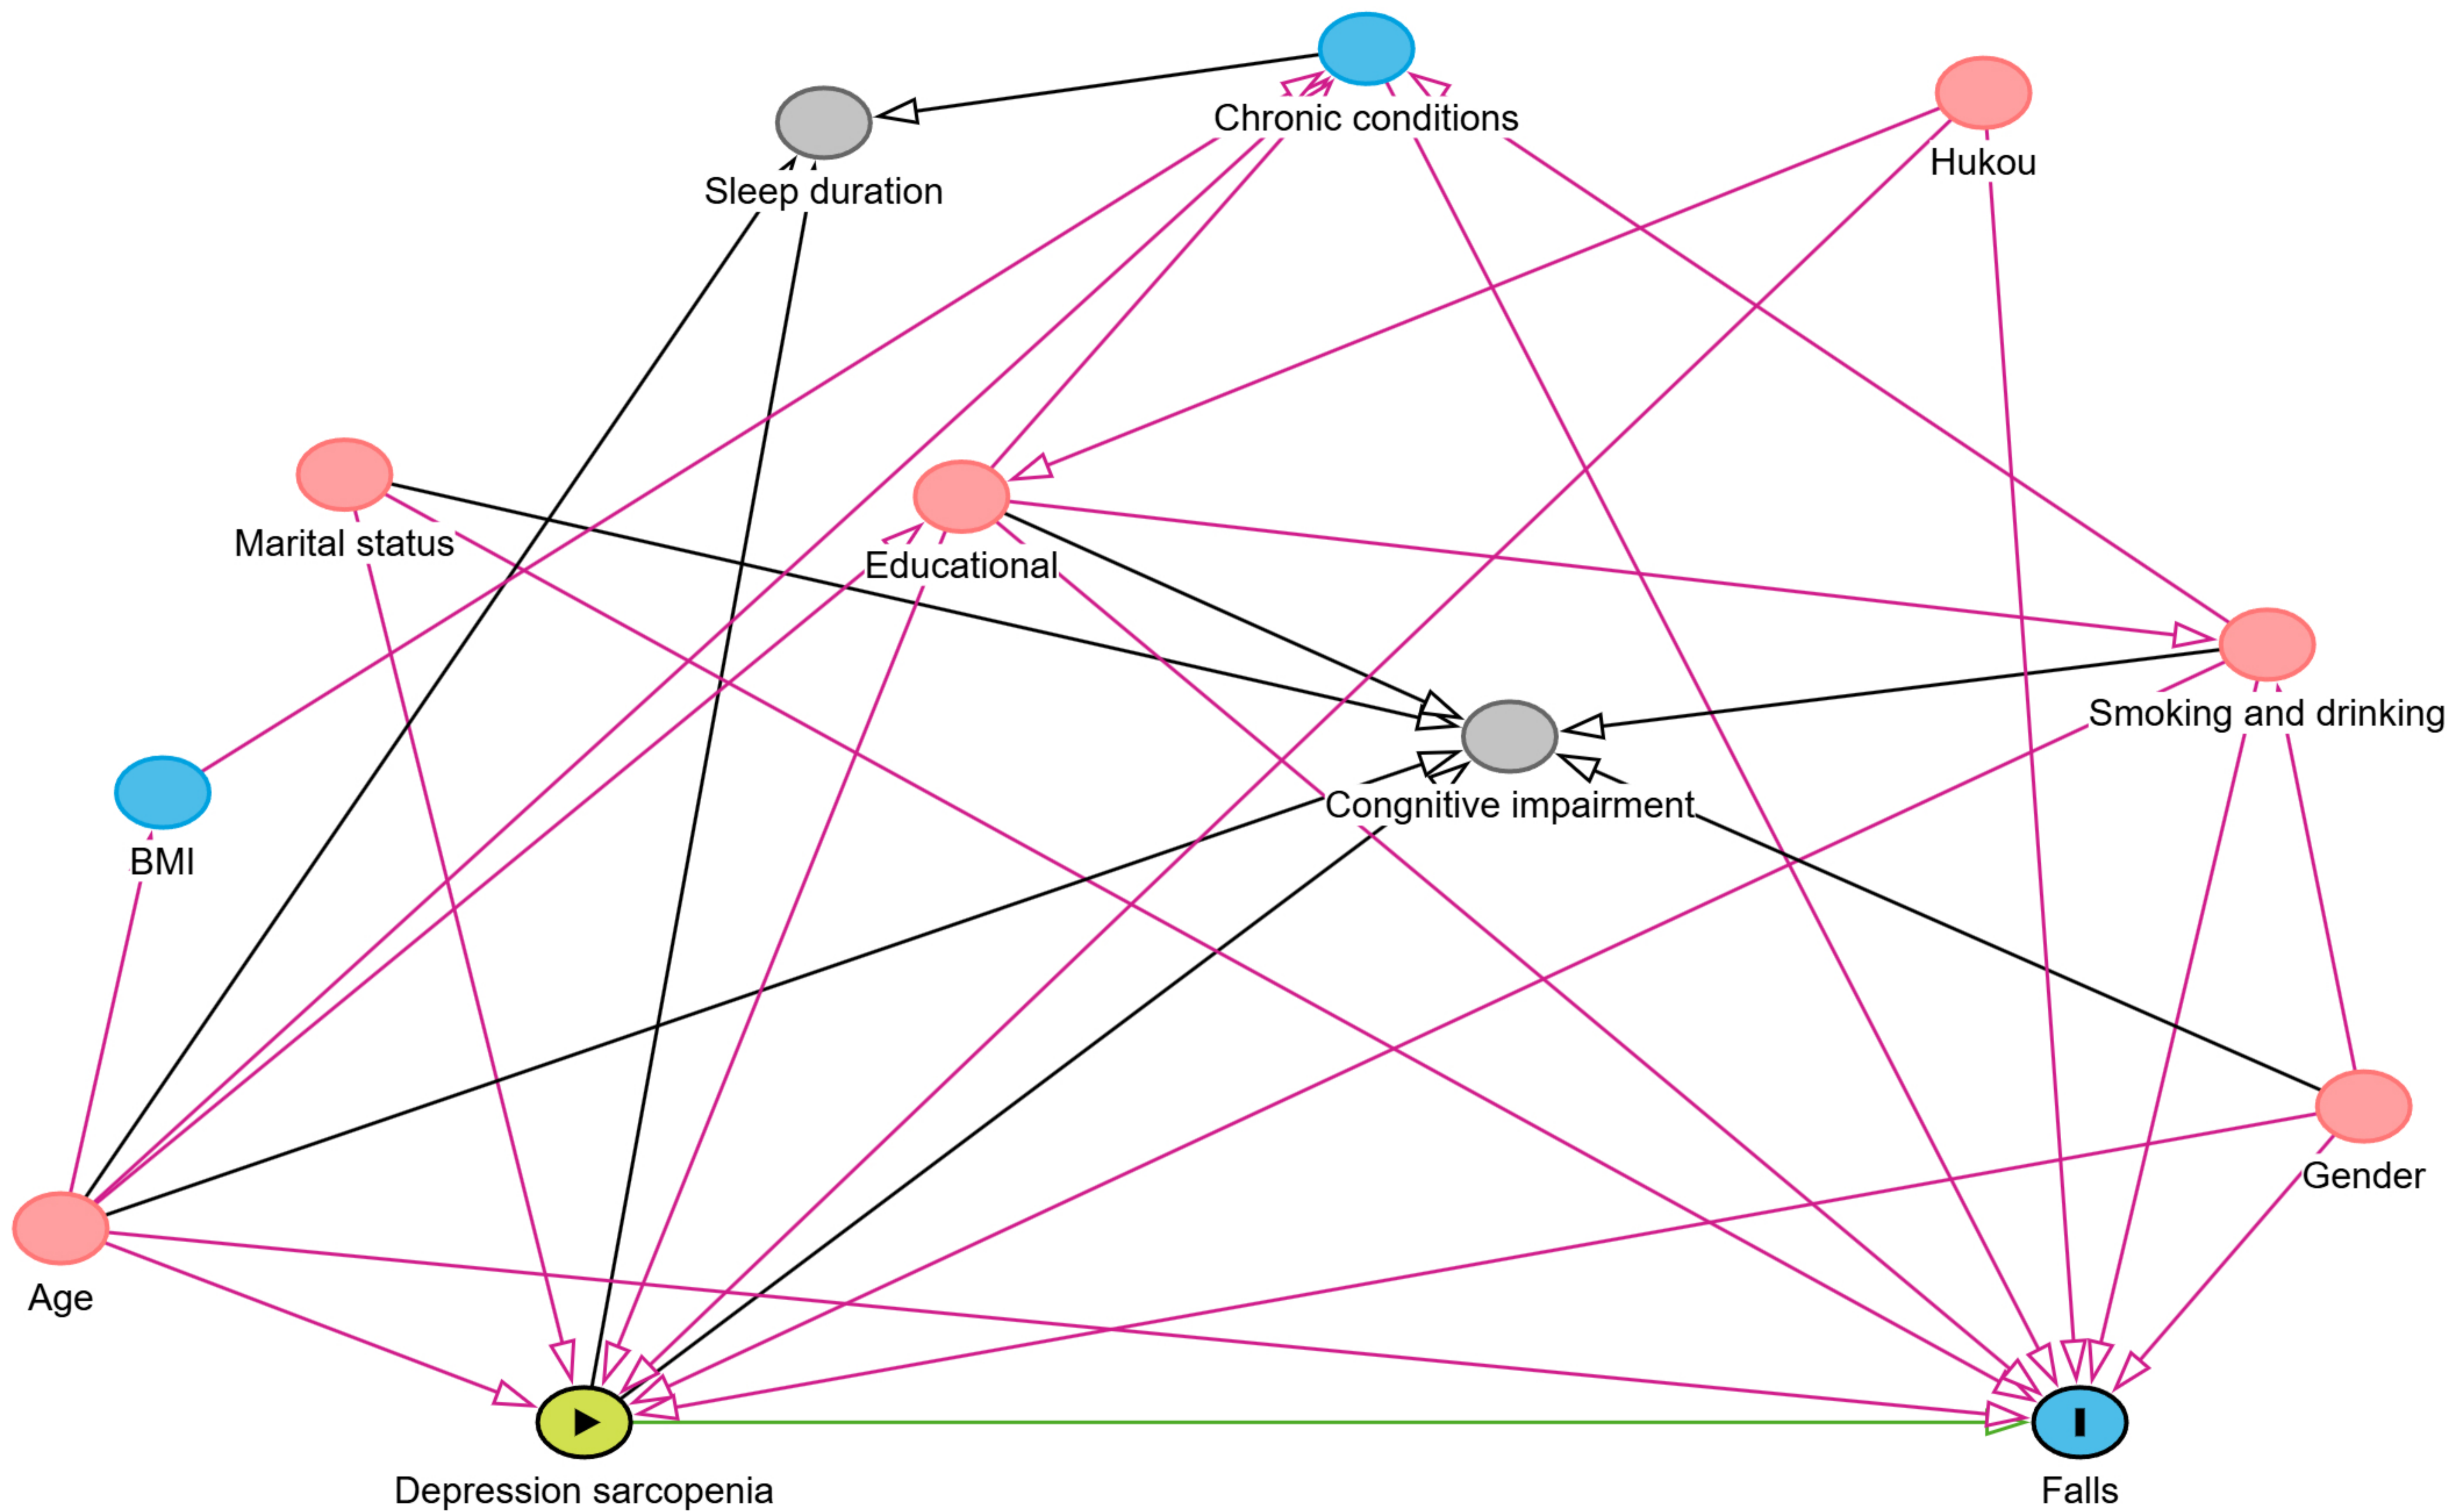

Supplement: Supplementary file 1 [file Supplementary Figure 1.pdf › Supplementary Figure 1.pdf]
